# Supplementary material for: Fair Allocation of Indivisible Goods: Improvement
Source: Atypon-hosted journal article supplement (doi:10.1287/moor.2020.1096), 2021-04-06
Supplement: moor.2020.1096.sm1.pdf [file moor.2020.1096.sm1.pdf]

## Appendix

### A. Omitted Proofs of Section 2

**Proof of Lemma 1:** The key idea is that given  $MMS_i \geq 1$  for an agent  $a_i$ , then for every item  $b_j \in \mathcal{M}$  we have  $MMS_i^{n-1}(\mathcal{M} \setminus b_j) \geq 1$ . This holds since removing an item from  $\mathcal{M}$  will diminish the value of at most one partition in the optimal  $n$  partitioning of the items. Therefore, at least  $n - 1$  partitions have a value of 1 or more to  $a_i$  and thus  $MMS_i^{n-1}(\mathcal{M} \setminus b_j) \geq 1$ . The rest of the proof follows from the definition of  $\alpha$ -irreducibility. If the valuation of an item  $b_j$  to an agent  $a_i$  is at least  $\alpha$ , then the problem is  $\alpha$ -reducible since if we allocate  $b_j$  to  $a_i$ , we have

$$MMS_k^{n-1}(\mathcal{M} \setminus \{b_j\}) \geq 1$$

for every agent  $a_k \neq a_i$ . This contradicts the  $\alpha$ -irreducibility assumption.  $\square$

**Proof of Lemma 2:** Suppose for the sake of contradiction that for every agent  $a_{i'} \neq a_i$  we have  $V_{i'}(\{b_j, b_k\}) \leq 1$ . By this assumption, we show

$$MMS_{i'}^{n-1}(\mathcal{M} \setminus \{b_j, b_k\}) \geq 1 \tag{1}$$

holds. This is true since removing two items  $b_j$  and  $b_k$  from  $\mathcal{M}$  decreases the value of at most two partitions of the optimal partitioning of  $\mathcal{M}$  for  $MMS_{i'}$ . If  $n - 1$  partitions remain intact, then Inequality (1) trivially holds. If not, merging the two partitions that initially contained  $b_j$  and  $b_k$  results in a partition with value at least 1 to  $a_i$ . This partition together with the  $n - 2$  remaining partitions result in a desirable partitioning of  $\mathcal{M}$  into  $n - 1$  partitions. Therefore, Inequality (1) holds for any agent  $a_{i'}$ , and this implies that by allocating  $S = \{b_j, b_k\}$  to  $a_i$ , not only does  $V_i(S) \geq 3/4$  hold, but also for every  $a_{i'} \neq a_i$  we have

$$MMS_{i'}^{n-1}(\mathcal{M} \setminus \{b_j, b_k\}) \geq 1,$$

which means the instance is  $3/4$ -reducible, which contradicts our assumption.  $\square$

**Proof of Lemma 3:** To prove this lemma, we apply Lemma 2,  $|T|$  times. Consider an agent  $a_i \notin T$ . According to the argument in Lemma 2, if we assign  $b_{j_1}$  and  $b_{j_2}$  to  $a_{i_1}$ ,  $a_i$  can partition the items in  $\mathcal{M} \setminus \{b_{j_1}, b_{j_2}\}$  into  $n - 1$  partitions with value at least 1 to  $a_i$ , i.e.

$$MMS_i^{n-1}(\mathcal{M} \setminus \{b_{j_1}, b_{j_2}\}) \geq 1.$$

By the same argument, after assigning  $b_{j_3}$  and  $b_{j_4}$  to  $a_{i_2}$ , we have

$$MMS_i^{n-2}(\mathcal{M} \setminus \{b_{j_1}, b_{j_2}, b_{j_3}, b_{j_4}\}) \geq 1.$$

Repeating above argument  $|T|$  times implies  $MMS_i^{n-|T|}(\mathcal{M} \setminus S) \geq 1$ . On the other hand, by the second condition, every agent  $a_{i_k}$  satisfies with items  $b_{j_{2k-1}}$  and  $b_{j_{2k}}$ . This means that we can reduce the instance by satisfying the agents in  $T$  by the items in  $S$ , which contradicts the irreducibility assumption.  $\square$

**Proof of Lemma 4:** As discussed before, all the vertices in  $\mathcal{X}$  are saturated by  $M$ . Consequently, for any subset  $S \subseteq \mathcal{X}$ , all the vertices of  $S$  are saturated by  $M$  and  $|N(S)| \geq |S|$ . Let  $M(S)$  be the set of vertices that are matched to the vertices of  $S$  in  $M$ . We know that every vertex of  $S$  is present in at least one of the alternating paths which connect  $\mathcal{Y}$  to  $\mathcal{Y}$ . Let

$$P = \langle y_0, x_1, y_1, x_2, y_2, \dots, x_k, y_k \rangle$$

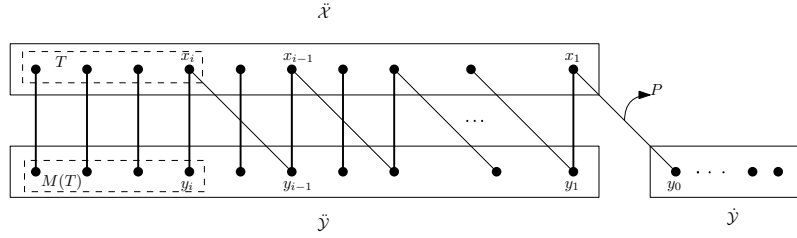

FIGURE 10. Alternating path  $P$  connects  $\hat{\mathcal{Y}}_1$  to  $\hat{\mathcal{Y}}_2$  and intersects  $S$

be one of these paths that includes at least one of the vertices of  $S$ . Since  $P$  is an alternating path which connects  $\hat{\mathcal{Y}}$  to  $\hat{\mathcal{Y}}$ ,  $y_0 \in \hat{\mathcal{Y}}$  (see Figure 10). In addition, according to the definition of alternating path, every edge  $(x_j, y_j)$  of  $P$  belongs to  $M$  and every edge  $(x_j, y_{j-1})$  does not belong to  $M$ . Let  $x_i$  be the first vertex of  $S$  that appears in  $P$ . We know that the edge  $(x_i, y_{i-1})$  does not belong to  $M$ . On the other hand, since  $x_i$  is the first vertex of  $S$  in  $M$ ,  $x_{i-1} \notin S$ . Note that  $y_{i-1}$  does not belong to  $M(S)$ , since every vertex of  $M(S)$  is matched with a vertex of  $S$  in  $M$  and  $(x_{i-1}, y_{i-1})$  is in  $M$ . The fact that  $y_{i-1} \notin M(S)$  means  $N(S)$  contains at least one vertex that is not in  $M(S)$ . Since all the vertices in  $M(S)$  are in  $N(S)$ ,  $|N(S)| > |M(S)|$  and hence,  $|N(S)| > |S|$ .  $\square$

**Proof of Lemma 5:** We describe the proof for the first condition in more details. The proof for the second condition is almost the same as the first condition.

**The first condition.** Suppose that there exists no such vertex. Our goal is to find a new matching of  $G$  with the same size, but with a more weight. To this end, we construct a directed graph  $H$  from  $G$  as follows: for each  $\hat{y}_j \in T$  we consider a vertex  $v_j$  in  $V(H)$ . Furthermore, there is a directed edge from  $v_j$  to  $v_i$  in  $H$ , if and only if  $w(\hat{x}_j, \hat{y}_j) < w(\hat{x}_i, \hat{y}_j)$  in  $G$ .

If there exists a vertex  $v_j$  with out-degree zero in  $H$ , then  $\hat{y}_j$  is the desired vertex in  $T$ , since

$$\forall \hat{y}_i \in H, w(\hat{x}_j, \hat{y}_j) \geq w(\hat{x}_i, \hat{y}_j).$$

Otherwise, the out-degree of every vertex in  $G$  is non-zero. Therefore,  $H$  has at least one cycle  $L = \langle v_{l_1}, v_{l_2}, \dots, v_{l_{|L|}} \rangle$ . Now, if we change matching  $M$  by removing the set of edges

$$\{(\hat{y}_{l_1}, \hat{x}_{l_1}), (\hat{y}_{l_2}, \hat{x}_{l_2}), \dots, (\hat{y}_{l_{|L|}}, \hat{x}_{l_{|L|}})\}$$

from  $M$  and adding

$$\{(\hat{y}_{l_1}, \hat{x}_{l_2}), (\hat{y}_{l_2}, \hat{x}_{l_3}), \dots, (\hat{y}_{l_{|L|}}, \hat{x}_{l_1})\}$$

to  $M$ , the weight of our matching will be increased. Note that by the definition of an edge in  $H$ , we have

$$w(\hat{x}_{l_2}, \hat{y}_{l_1}) > w(\hat{x}_{l_1}, \hat{y}_{l_1}), w(\hat{x}_{l_3}, \hat{y}_{l_2}) > w(\hat{x}_{l_2}, \hat{y}_{l_2}), \dots, w(\hat{x}_{l_1}, \hat{y}_{l_{|L|}}) > w(\hat{x}_{l_{|L|}}, \hat{y}_{l_{|L|}}).$$

But this contradicts the fact that  $M$  was **MCMWM** of  $G$ .

**The second condition:** Similar to the proof of the first condition, we construct a new directed graph  $H$  from  $G$  where we have a vertex  $v_j$  in  $H$  for each vertex  $\hat{y}_j$  in  $T$ . For every pair  $\hat{y}_i$  and  $\hat{y}_j$  which are members of  $T$  we connect  $v_i$  to  $v_j$  with a directed edge in  $H$  if

$$w(\hat{x}_j, \hat{y}_i) > w(\hat{x}_i, \hat{y}_i)$$

in  $G$  and  $(\hat{x}_j, \hat{y}_i) \in E(G)$ . Note that if  $H$  contains a vertex  $v_i$  with in-degree equal to zero, then  $\hat{y}_i$  is the desired loser in  $T$ . Thus, suppose that no vertex in  $H$  has in-degree zero and hence,  $H$  has a directed cycle. Let  $L = \langle \hat{y}_{l_1}, \hat{y}_{l_2}, \dots, \hat{y}_{l_{|L|}} \rangle$  be a directed cycle in  $H$ . Similar to the proof of

the previous condition, we leverage  $L$  to alter  $M$  to a new matching with more weight, which is a contradiction by the maximality of  $M$ .

**The third condition:** If  $w(\hat{x}_i, \hat{y}_i) < w(\hat{x}_j, \hat{y}_i)$ , we can replace the edge between  $\hat{x}_i$  and  $\hat{y}_i$  by  $(\hat{x}_j, \hat{y}_i)$  in  $M$  which yields a matching with a greater weight. This contradicts the maximality of  $M$ .  $\square$

## B. Omitted Proofs of Section 3.2

**Proof of Lemma 6:** First, we prove Lemma 16. This lemma ensures that there exists a matching in  $G_1$  that saturates all the vertices in  $U$ . Lemma 16 is a consequence of irreducibility. In fact, we show that if the condition in Lemma 16 does not hold, the instance is reducible.

LEMMA 16. *For all  $R \subseteq U$  we have  $|N(R)| > |R|$ .*

**Proof.** Let  $M_1$  a matching with the maximum number of edges in  $G_1$ . By Lemma 4, it only suffices to show that all the vertices in  $U$  belong to  $\tilde{U}$ . In other words, we must show that  $\tilde{U}$  is empty. Recall that by the way we select the vertices of  $U$ , we know that no vertex in  $U$  is isolated. For the sake of contradiction, suppose that  $\tilde{U}$  is not empty. As mentioned before, there exists a matching between  $\tilde{U}$  and  $N(\tilde{U})$  that saturates all the vertices in  $N(\tilde{U})$ . Let

$$M_S = \{(x_{j_1}, y_{i_1}), (x_{j_2}, y_{i_2}), \dots, (x_{j_k}, y_{i_k})\}$$

be this matching. We show that the set of agents  $T = \{a_{i_1}, a_{i_2}, \dots, a_{i_k}\}$  and the set of items  $S = \{f_{i_1}, b_{j_1}, f_{i_2}, b_{j_2}, \dots, f_{i_k}, b_{j_k}\}$  have all three conditions of Lemma 3 (Note that  $f_{i_l}$  contains exactly one item). The first condition is trivial:  $|S| = 2|T|$ . Regarding the definition of an edge in  $G_1$ , we know that  $f_{i_l} \cup \{b_{j_l}\}$  satisfy  $a_{i_l}$  and hence, the second condition is held as well. For the third condition, we should prove that for every agent  $a_{i_l}$  in  $T$ ,

$$V_{i'}(f_{i_l} \cup \{b_{j_l}\}) < 1 \quad \forall a_{i'} \notin T.$$

To show this, we consider two cases separately. First, if  $a_{i'} \notin \mathcal{C}_1$ , by Lemma 3,  $V_{i'}(f_{i_l}) < 1/2$ . Furthermore, we have  $V_{i'}(\{b_{j_l}\}) < 1/2$ , which means  $V_{i'}(f_{i_l} \cup \{b_{j_l}\}) < 1$ .

Now, consider the case that  $a_{i'} \in \mathcal{C}_1$ . Since  $a_{i'} \notin T$ , it's corresponding vertex  $y_{i'}$  is not in  $N(\tilde{U})$ , which means  $y_{i'} \in \tilde{\mathcal{Y}} \setminus N(\tilde{U})$ . By definition, there is no edge between  $y_{i'}$  and  $x_{j_l}$  and hence,  $V_{i'}(\{b_{j_l}\}) < \epsilon_{i'} \leq 1/4$ . On the other hand, by the irreducibility assumption and the fact that  $f_{i_l}$  contains exactly one item,  $V_{i'}(f_{i_l}) < 3/4$ . Thus,  $V_{i'}(f_{i_l} \cup \{b_{j_l}\}) < 1$ .

As a result,  $V_{i'}(f_{i_l} \cup \{b_{j_l}\}) < 1$  for every agent  $a_{i'} \notin T$  which means the third condition of Lemma 3 is held as well. Thus, regarding Lemma 3, the instance is reducible which contradicts our irreducibility assumption.  $\square$

The rest of the proof of Lemma 6 is as follows. Since we used MCMWM to build cluster  $\mathcal{C}_1$ , regarding Lemma 5,  $\mathcal{C}_1$  is envy-cycle-free. Consider the topological ordering of  $\mathcal{C}_1$  and let  $p_{a_i}$  be the position of  $a_i$  in this ordering. More precisely,  $p_{a_i} = k$  if  $a_i$  is the  $k$ -th agent in the topological ordering of  $\mathcal{C}_1$ . According to Lemma 16, the condition of Hall's Theorem holds for graph  $G_1$  and as a result there exists a matching in  $G_1$  that saturates all the vertices in  $U$ . Among all possible maximum matchings of  $G_1$ , let  $M_1$  be a maximum matching that minimizes

$$p_{M_1} = \sum_{y_i \in M_1} p_{a_i}.$$

We claim that  $M_1$  is the desired matching described in Lemma 6. To prove our claim, we must show that for any edge  $(x_i, y_j) \in M_1$  and any unsaturated vertex  $y_k \in N(x_i)$ , agent  $a_k$  does not envy

$a_j$ . Note that if  $a_k$  envies  $a_j$ ,  $a_k$  appears before  $a_j$  in the topological ordering of  $\mathcal{C}_1$  which means  $p_{a_k} < p_{a_j}$ . Therefore, if we replace  $(x_i, y_j)$  by  $(x_i, y_k)$  in  $M_1$ ,  $p_{M_1}$  will be decreased that contradicts the minimality of  $p_{M_1}$ .  $\square$

**Proof of Lemma 7:** Let  $a_j$  be an agent in  $\mathcal{S}_1^r$ . First, note that  $|f_j| = |g_j| = 1$ . Lemma 3 together with Lemma 4 state that  $V_i(f_j \cup g_j) < 1$ . According to Inequality (1), we have

$$\text{MMS}_i^{|\mathcal{M} \setminus a_j|}(\mathcal{M} \setminus f_j \cup g_j) \geq 1. \quad (2)$$

Note that Equation (2) holds for every agent in  $\mathcal{S}_1^r$ . Applying Equation (2) to all the agents of  $\mathcal{S}_1^r$  yields

$$\text{MMS}_i^{|\mathcal{M} \setminus \mathcal{S}_1^r|}(\mathcal{M} \setminus \bigcup_{y_i \in \mathcal{S}_1^r} f_i \cup g_i) \geq 1. \quad \square$$

**Proof of Lemma 8:** Suppose for the sake of contradiction that the problem is  $3/4$ -irreducible, and there exists a vertex  $y_k \in \mathcal{Y}$  such that  $V_k(\{b_i, b_j\}) \geq 3/4$ . According to Lemma 2 there exists an agent  $a_{k'} \neq a_k$  such that  $V_{k'}(\{b_i, b_j\}) \geq 1$ . Since the valuations are additive, we know that one of the inequalities  $V_{k'}(\{b_i\}) \geq 1/2$  or  $V_{k'}(\{b_j\}) \geq 1/2$  holds, which is contradiction, since we know both  $x_i$  and  $x_j$  are isolated vertices in  $\mathcal{X}'$ .  $\square$

### C. Omitted Proofs of Section 3.3

**Proof of Lemma 11:** At this point, for every agent  $a_i \in \mathcal{C}_1 \cup \mathcal{C}_2 \cup \mathcal{C}_3^s$ ,  $|f_j| \leq 2$ . If  $|f_i| = 1$  holds, then according to Lemma 1, value of the item in  $f_i$  is less than  $3/4$  to all other agents. Moreover, if  $|f_i| = 2$ , then  $f_i$  corresponds to a merged vertex. In this case, by Lemmas 5 and 8, value of  $f_i$  is less than  $3/4$  to all other agents.  $\square$

**Proof of Lemma 9:** According to Lemma 10, value of every pair of items in  $\mathcal{F}$  is less than  $1/2$  to  $a_i$ . Therefore,  $f_i$  contains at least three items. Let  $b_k$  be an arbitrary item in  $f_i$ . Since  $|f_i| \geq 3$ ,  $f_i \setminus \{b_k\}$  is non-empty. On the other hand,  $S$  is minimal and hence, none of the sets  $f_i \setminus b_k$  and  $\{b_k\}$  is feasible for any agent. According to the definition of feasibility for the agents of  $\mathcal{C}_1 \cup \mathcal{C}_2 \cup \mathcal{C}_3^s \cup \mathcal{C}_3^b$ , we have

$$\forall a_j \in \mathcal{C}_1 \cup \mathcal{C}_2 \cup \mathcal{C}_3^s \cup \mathcal{C}_3^b \quad V_j(f_i \setminus \{b_k\}) < \epsilon_j$$

and

$$\forall a_j \in \mathcal{C}_1 \cup \mathcal{C}_2 \cup \mathcal{C}_3^s \cup \mathcal{C}_3^b \quad V_j(\{b_k\}) < \epsilon_j$$

which means

$$\forall a_j \in \mathcal{C}_1 \cup \mathcal{C}_2 \cup \mathcal{C}_3^s \cup \mathcal{C}_3^b \quad V_j(f_i) < 2\epsilon_j. \quad \square$$

**Proof of Lemma 10:** The Lemma trivially holds for  $\mathcal{C}_1$  and  $\mathcal{C}_2$ , since removing an agent from a envy-cycle-free set preserves this property. For  $\mathcal{C}_3^s$ , there may be multiple rounds that an agent is added to  $\mathcal{C}_3^s$ . We show that adding an agent to  $\mathcal{C}_3^s$  preserves envy-cycle-freeness as well.

Suppose that at some round  $\mathbb{R}_z$ , an agent  $a_i$  is added to  $\mathcal{C}_3^s$ . By Lemma 9 we have:

$$\forall a_j \in \mathcal{C}_3^s, j \neq i, \quad V_j(f_i) < 2\epsilon_j. \quad (3)$$

Since  $a_i$  previously belonged to  $\mathcal{C}_3^f$ , we have

$$\forall a_j \in \mathcal{C}_3^s, j \neq i, \quad V_i(f_j) < 1/2. \quad (4)$$

Inequalities (3) and (4) together imply that  $a_i$  does not envy any agent in  $\mathcal{C}_3^s$ , and no agent in  $\mathcal{C}_3^s$  envies  $a_i$ , which implies that  $\mathcal{C}_3^s$  remains envy-cycle-free.  $\square$

**Proof of Lemma 11:** By the priority rule we select the agents from  $\Phi(S)$ , If  $a_j \prec_{pr} a_i$ , then  $g_i$  is not feasible for  $a_j$ . Thus,  $V_j(g_i) < \epsilon_j$ . For the case where  $a_i \prec_{pr} a_j$ , let  $b_k$  be an arbitrary item of  $g_i$ . According to the fact that  $g_i$  is minimal,  $g_i \setminus \{b_k\}$  is not feasible for any agent. Hence,  $V_j(g_i \setminus \{b_k\}) < \epsilon_j$ . On the other hand, by Observations 5 and 7,  $V_j(\{b_k\}) < \epsilon_j$ . Therefore,  $V_j(g_i) < 2\epsilon_j$ .  $\square$

**Proof of Lemma 12:** Let  $\mathbb{R}_z$  be the round, in which  $a_i$  is satisfied. At that point, if  $a_j \in \mathcal{C}_3^f$  then  $V_j(g_i) < 1/2$  trivially holds. Since in round  $\mathbb{R}_z$ ,  $a_j \prec_{pr} a_i$  holds,  $g_i$  was not feasible for  $a_j$  in the first place. Recall that in each round, we select the smallest agent in  $\Phi(S)$  with respect to  $\prec_{pr}$ .

Furthermore, if in round  $\mathbb{R}_z$ ,  $a_j$  was in  $\mathcal{C}_3^s \cup \mathcal{C}_3^b$ , according to Observations 5 and 7,  $|S| \geq 2$ , since no item alone can satisfy  $a_i$ . If  $|S| = 2$ , then by Observation 10,  $V_j(g_i) < 1/2$ . For the case of  $|S| > 2$ , let  $b_k$  be the item in  $S$  with the minimum value to  $a_j$ . According to Corollary 2,  $V_j(\{b_k\}) < 1/4$ . Also, since  $S$  is minimal,  $S \setminus \{b_k\}$  is not feasible for any agent and hence,  $V_j(S \setminus \{b_k\}) < \epsilon_j \leq 1/4$ . Thus,  $V_j(S) < 1/2$ .  $\square$

#### D. Omitted Proofs of Section 3.4

Before proceeding to the proof of Lemma 13, we prove Lemmas 17, 18 and 19.

LEMMA 17. *Let  $a_i$  be an agent in  $\mathcal{S}_3$  and let  $\mathbb{R}_z$  be the round of the second phase in which  $a_i$  is satisfied. Then, for any other agent  $a_j$  that is in  $\mathcal{C}_3^f$  in  $\mathbb{R}_z$ ,  $V_j(g_i) < 1/2$  holds.*

**Proof.** In  $\mathbb{R}_z$ ,  $a_i$  either belongs to  $\mathcal{C}_3^s$  or  $\mathcal{C}_3^b$ . Thus,  $a_j \prec_{pr} a_i$ , and  $g_i$  is not feasible for  $a_j$  in that round. Therefore,  $V_j(g_i) < 1/2$ .  $\square$

LEMMA 18. *Let  $a_i \in \mathcal{S}_3$  be a satisfied agent and let  $\mathbb{R}_z$  be the round in which  $a_i$  is satisfied. Then, for every other agent  $a_j$  that belongs to  $\mathcal{C}_3^s \cup \mathcal{C}_3^b$  in that round, either  $V_j(g_i) < \epsilon_j$  or  $V_j(f_i) \leq 3/4 - \epsilon_j$ .*

**Proof.** If  $g_i$  is not feasible for  $a_j$ , then the condition trivially holds. Moreover, by the definition, the statement is correct for the agents of  $\mathcal{C}_3^b$ . Therefore, it only suffices to consider the case that  $a_j \in \mathcal{C}_3^s$  and  $g_i$  is feasible for  $a_j$ . Due to the priority rules for satisfying the agents in the second phase,  $a_i \prec_{pr} a_j$  and hence,  $a_i$  cannot be in  $\mathcal{C}_3^b$ . Thus,  $a_i \in \mathcal{C}_3^s$ . According to Observation 2 and the fact that  $\prec_{pr}$  is equivalent to  $\prec_o$  for the agents in  $\mathcal{C}_3^s$ , we have  $V_j(f_i) \leq 3/4 - \epsilon_j$ .  $\square$

LEMMA 19. *During the second phase, for any agent  $a_i$  in  $\mathcal{C}_3$ , we have:*

$$\sum_{a_j \in \mathcal{S}_3} V_i(f_j \cup g_j) < |\mathcal{S}_3| + 1/4.$$

**Proof.** To show Lemma 19, we show that for all the agents  $a_j \in \mathcal{S}_3$  except at most one agent,  $V_i(f_j \cup g_j) < 1$  holds. To show this, let  $\mathbb{R}_z$  be an arbitrary round of the second phase, in which an agent  $a_j \in \mathcal{C}_3$  is satisfied. First, note that in  $\mathbb{R}_z$ ,  $a_j$  belongs to  $\mathcal{C}_3^s \cup \mathcal{C}_3^b$ . Also, in round  $\mathbb{R}_z$ ,  $a_i$  belongs to one of  $\mathcal{C}_3^s, \mathcal{C}_3^b$ , or  $\mathcal{C}_3^f$ .

If  $a_i \in \mathcal{C}_3^f$ , then by Lemma 17,  $V_i(g_j) < 1/2$  holds. On the other hand, by definition,  $V_i(f_j) < 1/2$  and hence,  $V_i(f_j \cup g_j) < 1$ .

Now, consider the case, where  $a_i \in \mathcal{C}_3^b \cup \mathcal{C}_3^s$ . Note that by Lemma 18, either  $V_i(f_j) \leq 3/4 - \epsilon_i$  or  $V_i(g_j) < \epsilon_i$ . If  $V_i(g_j) < \epsilon_i$ , then by Lemmas 11 and 9, we know  $V_i(f_j) < 3/4$  and hence,  $V_i(f_j \cup g_j) < 3/4 + \epsilon_i < 1$ .

For the case that  $V_i(f_j) \leq 3/4 - \epsilon_i$ , let  $b_l$  be the item in  $g_j$  with the maximum value to  $a_i$ . Since  $|g_j|$  is minimal,  $g_j \setminus \{b_l\}$  is not feasible for any agent, including  $a_i$  and thus,  $V_i(g_j \setminus \{b_l\}) < \epsilon_i$ . Recall

that by Corollary 2, there is at most one item  $b_k$  in  $\mathcal{F}$ , such that  $V_i(b_k) \geq 1/4$ . In addition to this,  $V_i(b_k) < 1/2$  trivially holds, since  $b_k$  is not assigned to any agent during the clustering phase. If  $b_l \neq b_k$ ,  $V_i(g_j) < 1/4 + \epsilon_i$  holds and hence,

$$V_i(f_j \cup g_j) < 3/4 - \epsilon_i + 1/4 + \epsilon_i < 1.$$

Moreover, If  $b_l = b_k$ ,  $V_i(g_j) < 1/2 + \epsilon_i$  holds and thus,  $V_i(f_j \cup g_j) < 3/4 - \epsilon_i + 1/2 + \epsilon_i < 5/4$ . But, this can happen at most one round. Therefore, for all the agents  $a_j \in \mathcal{S}_3$  except at most one,  $V_i(f_j \cup g_j) < 1$ . Also, for at most one agent  $a_j \in \mathcal{S}_3$ ,  $V_i(f_j \cup g_j) < 5/4$ . Thus,

$$\sum_{a_j \in \mathcal{S}_3} V_i(f_j \cup g_j) < |\mathcal{S}_3| + 1/4.$$

□

**Proof of Lemma 13:** Suppose for the sake of contradiction that  $\mathcal{C}_3 \neq \emptyset$ . Note that, by the definition of  $\mathcal{C}_3^b$ , if  $\mathcal{C}_3^s = \emptyset$  holds, then consequently  $\mathcal{C}_3^b = \emptyset$ . Therefore, since we have  $\mathcal{C}_3 = \mathcal{C}_3^s \cup \mathcal{C}_3^b \cup \mathcal{C}_3^f$ , if  $\mathcal{C}_3$  is non-empty, at least either of the two sets  $\mathcal{C}_3^s$  or  $\mathcal{C}_3^f$  is non-empty. In case  $\mathcal{C}_3^s$  is non-empty, let  $a_i$  be an agent of  $\mathcal{C}_3^s$  which does not envy any other agent in  $\mathcal{C}_3^s$ . Otherwise let  $a_i$  be an arbitrary agent of  $\mathcal{C}_3^f$ .

According to Lemma 12, for every agent  $a_j \in \mathcal{S}_1^s \cup \mathcal{S}_2^s$ ,  $V_i(g_j) < 1/2$  holds. Also, by Lemmas 4 and 9, for every agent  $a_j \in \mathcal{S}_1^r \cup \mathcal{S}_2^r$ , we have  $V_i(g_j) < 1/2$ . Therefore,

$$\forall a_j \in \mathcal{S}_1 \cup \mathcal{S}_2 \quad V_i(g_j) < 1/2.$$

Also, by Lemmas 3 and 6 we know that  $V_i(f_j) < 1/2$  for every  $a_j \in \mathcal{S}_1 \cup \mathcal{S}_2$ . Thus, for every satisfied agent  $a_j \in \mathcal{S}_1 \cup \mathcal{S}_2$ ,  $V_i(f_j \cup g_j) < 1$  holds, and hence

$$\sum_{a_j \in \mathcal{S}_1 \cup \mathcal{S}_2} V_i(f_j \cup g_j) < |\mathcal{S}_1 \cup \mathcal{S}_2|. \quad (5)$$

Moreover, by Lemma 19, the total value of items assigned to the agents in  $\mathcal{S}_3$  to  $a_i$  is less than  $|\mathcal{S}_3| + 1/4$ . More precisely,

$$\sum_{a_j \in \mathcal{S}_3} V_i(f_j \cup g_j) \leq |\mathcal{S}_3| + 1/4. \quad (6)$$

Inequality (5) along with Inequality (6) implies:

$$\begin{aligned} \sum_{a_j \in \mathcal{S}} V_i(f_j \cup g_j) &= \sum_{a_j \in \mathcal{S}_1 \cup \mathcal{S}_2} V_i(f_j \cup g_j) + \sum_{a_j \in \mathcal{S}_3} V_i(f_j \cup g_j) \\ &< |\mathcal{S}_1 \cup \mathcal{S}_2| + |\mathcal{S}_3| + 1/4 \\ &= |\mathcal{S}| + 1/4 \end{aligned} \quad (7)$$

Recall that the total sum of the item values for  $a_i$  is equal to  $n$ . In addition to this, since every agent belongs to either of the Clusters  $\mathcal{C}_1$ ,  $\mathcal{C}_2$ ,  $\mathcal{C}_3$ , or  $\mathcal{S}$  we have

$$|\mathcal{S}| + |\mathcal{C}_1| + |\mathcal{C}_2| + |\mathcal{C}_3| = n.$$

Furthermore, every item  $b_j \in \mathcal{M}$  either belongs to  $\mathcal{F}$  or one of the sets  $f_{j'}$  and  $g_{j'}$  for an agent  $a_{j'}$ . More precisely,

$$\mathcal{F} = \mathcal{M} \setminus \left[ \bigcup_{a_j \in \mathcal{S} \cup \mathcal{C}_1 \cup \mathcal{C}_2 \cup \mathcal{C}_3^s} f_j \cup \bigcup_{a_j \in \mathcal{S}} g_j \right].$$

Therefore

$$\begin{aligned}
 \sum_{a_j \in \mathcal{C}_1} V_i(f_j) + \sum_{a_j \in \mathcal{C}_2} V_i(f_j) + \sum_{a_j \in \mathcal{C}_3^s} V_i(f_j) + V_i(\mathcal{F}) &= V_i(\mathcal{M}) - \sum_{a_j \in \mathcal{S}} V_i(f_j \cup g_j) \\
 &= n - \sum_{a_j \in \mathcal{S}} V_i(f_j \cup g_j) \\
 &\geq n - (|\mathcal{S}| + 1/4) \\
 &= |\mathcal{C}_1| + |\mathcal{C}_2| + |\mathcal{C}_3| - 1/4
 \end{aligned} \tag{8}$$

According to Lemmas 3 and 7,

$$\sum_{a_j \in \mathcal{C}_1} V_i(f_j) < 1/2|\mathcal{C}_1| \tag{9}$$

and

$$\sum_{a_j \in \mathcal{C}_2} V_i(f_j) < 1/2|\mathcal{C}_2| \tag{10}$$

hold. Inequalities (8), (9), and (10) together prove

$$\begin{aligned}
 V_i(\mathcal{F}) &\geq |\mathcal{C}_1| + |\mathcal{C}_2| + |\mathcal{C}_3| - 1/4 - \left[ \sum_{a_j \in \mathcal{C}_1} V_i(f_j) + \sum_{a_j \in \mathcal{C}_2} V_i(f_j) + \sum_{a_j \in \mathcal{C}_3^s} V_i(f_j) \right] \\
 &\geq |\mathcal{C}_1| + |\mathcal{C}_2| + |\mathcal{C}_3| - 1/4 - \left[ 1/2|\mathcal{C}_1| + 1/2|\mathcal{C}_2| + \sum_{a_j \in \mathcal{C}_3^s} V_i(f_j) \right] \\
 &\geq 1/2|\mathcal{C}_1| + 1/2|\mathcal{C}_2| + |\mathcal{C}_3| - 1/4 - \sum_{a_j \in \mathcal{C}_3^s} V_i(f_j).
 \end{aligned} \tag{11}$$

Now, we consider two cases separately: (i)  $a_i \in \mathcal{C}_3^s$  and (ii)  $a_i \in \mathcal{C}_3^f$ .

**In case**  $a_i \in \mathcal{C}_3^s$ , since  $a_i$  does not envy any other agent in  $\mathcal{C}_3^s$ , we have

$$\begin{aligned}
 \sum_{a_j \in \mathcal{C}_3^s} V_i(f_j) &\leq \sum_{a_j \in \mathcal{C}_3^s} V_i(f_i) \\
 &= \sum_{a_j \in \mathcal{C}_3^s} 3/4 - \epsilon_i \\
 &= (3/4 - \epsilon_i)|\mathcal{C}_3^s|.
 \end{aligned} \tag{12}$$

This combined with Inequality (11) concludes

$$\begin{aligned}
 V(\mathcal{F}) &\geq 1/2|\mathcal{C}_1| + 1/2|\mathcal{C}_2| + |\mathcal{C}_3| - 1/4 - \sum_{a_j \in \mathcal{C}_3^s} V_i(f_j) \\
 &\geq 1/2|\mathcal{C}_1| + 1/2|\mathcal{C}_2| + |\mathcal{C}_3| - 1/4 - (3/4 - \epsilon_i)|\mathcal{C}_3^s| \\
 &\geq 1/2|\mathcal{C}_1| + 1/2|\mathcal{C}_2| + (1/4 + \epsilon)|\mathcal{C}_3| - 1/4.
 \end{aligned}$$

On the other hand, since  $a_i \in \mathcal{C}_3^s$ ,  $|\mathcal{C}_3| \geq 1$  and hence,  $V_i(\mathcal{F}) \geq 1/4 + \epsilon_j - 1/4 = \epsilon_j$ . This means that  $\mathcal{F}$  is feasible for  $a_i$ , which contradicts the termination of the algorithm.

**In case**  $a_i \in \mathcal{C}_3^f$ , by the definition of  $\mathcal{C}_3^f$  we know that  $\sum_{a_j \in \mathcal{C}_3^s} V_i(f_j) < 1/2|\mathcal{C}_3^s|$ , which by Inequality (11) implies:

$$V_i(\mathcal{F}) > 1/2|\mathcal{C}_3^s| + |\mathcal{C}_3^b| + |\mathcal{C}_3^f| + 1/2|\mathcal{C}_2| + 1/2|\mathcal{C}_1| - 1/4.$$

Since  $a_i \in \mathcal{C}_3^f$ , we have  $|\mathcal{C}_3^f| \geq 1$  and hence,  $V_i(\mathcal{F}) > 3/4$ . Again, this contradicts the termination of the algorithm since  $\mathcal{F}$  is feasible for  $a_i$ .  $\square$

**Proof of Lemma 14:** By Lemma 13, we already know  $\mathcal{C}_3 = \emptyset$ . Now, let  $a_i$  be an agent of  $\mathcal{C}_1$ , which does not envy any other agent in  $\mathcal{C}_1$ . For convenience, we color the items in either blue or white.

Intuitively, blue items may have a high value for  $a_i$  whereas white items are always of lower value to  $a_i$ . Initially, all items are colored in white. For each  $a_j \in \mathcal{N}$ , if  $|f_j| = 1$ , then we color the item in  $f_j$  in blue. Moreover, for every  $a_j \in \mathcal{S}$ , if  $|g_j| = 1$  and  $V_i(g_j) \geq \epsilon_i$ , then we color the item in  $g_j$  in blue.

Now, let  $\mathcal{P} = \langle P_1, P_2, \dots, P_n \rangle$  be the optimal  $n$ -partitioning of the items in  $\mathcal{M}$  for  $a_i$ , that is, the value of every partition  $P_k$  to  $a_i$  is at least 1. Based on the coloring procedure, we have three types of partitions in  $\mathcal{P}$ :

- $B_2$ : the set of partitions with at least two blue items
- $B_1$ : the set of partitions with exactly one blue item
- $B_0$ : the set of partitions without any blue items

Note that every partition in  $\mathcal{P}$  belongs to one of  $B_0, B_1$  or  $B_2$ . Hence,

$$|B_0| + |B_1| + |B_2| = n \quad (13)$$

As declared, all the items in the partitions of  $B_0$  are white. The total value of these items to  $a_i$  is at least  $|B_0| \geq 4\epsilon_i|B_0|$ , which is

$$\sum_{P_k \in B_0} \sum_{b_j \in P_k} V_i(b_j) \geq 4\epsilon_i|B_0|. \quad (14)$$

Also, each partition in  $B_2$  has at least two blue items, each of which is singly assigned to another agent. We decompose the partitions of  $B_1$  into two disjoint sets, namely  $\hat{B}_1$  and  $\tilde{B}_1$ . More precisely, let  $\hat{B}_1$  be the partitions in  $B_1$ , in which the blue item is worth more than  $V_i(f_i)$  to  $a_i$  and  $\tilde{B}_1 = B_1 \setminus \hat{B}_1$ . As such, for each partition  $P_k \in \tilde{B}_1$ , the white items in  $P_k$  are worth at least

$$\begin{aligned} 1 - V_i(f_i) &= 1 - (3/4 - \epsilon_i) \\ &= 1/4 + \epsilon_i \\ &\geq 2\epsilon_i \end{aligned}$$

to  $a_i$ . Therefore,

$$\sum_{P_k \in \tilde{B}_1} V_i(\mathcal{W}(P_k)) \geq 2|\tilde{B}_1|\epsilon_i \quad (15)$$

where  $\mathcal{W}(S)$  stands for the set of white items in a set  $S$  of items. On the other hand, since the problem is  $3/4$ -irreducible, by Lemma 1, no item alone is of worth  $3/4$  to  $a_i$  and thus for each partition  $P_k \in \hat{B}_1$ , the white items in  $P_k$  have a value of at least  $1/4 \geq \epsilon_i$  to  $a_i$ . This implies that

$$\sum_{P_k \in \hat{B}_1} V_i(\mathcal{W}(P_k)) \geq |\hat{B}_1|\epsilon_i. \quad (16)$$

By Inequalities (13), (14), (15), and (16) we have

$$\begin{aligned} V_i(\mathcal{W}(\mathcal{M})) &= \sum_{P_j \in B_0} V_i(\mathcal{W}(P_j)) + \sum_{P_j \in B_1} V_i(\mathcal{W}(P_j)) + \sum_{P_j \in B_2} V_i(\mathcal{W}(P_j)) \\ &\geq \sum_{P_j \in B_0} V_i(\mathcal{W}(P_j)) + \sum_{P_j \in B_1} V_i(\mathcal{W}(P_j)) \\ &\geq \sum_{P_j \in B_0} V_i(\mathcal{W}(P_j)) + \sum_{P_j \in \tilde{B}_1} V_i(\mathcal{W}(P_j)) + \sum_{P_j \in \hat{B}_1} V_i(\mathcal{W}(P_j)) \\ &\geq |B_0|4\epsilon_i + |\hat{B}_1|\epsilon_i + |\tilde{B}_1|2\epsilon_i \\ &\geq |B_0|4\epsilon_i + |B_1|2\epsilon_i - |\hat{B}_1|\epsilon_i \\ &\geq |B_0|4\epsilon_i + |B_1|4\epsilon_i + |B_2|4\epsilon_i - |B_1|2\epsilon_i - |B_2|4\epsilon_i - |\hat{B}_1|\epsilon_i \\ &= (2n - 2|B_2| - |B_1| - |\hat{B}_1|)2\epsilon_i + (|\hat{B}_1|)\epsilon_i \end{aligned} \quad (17)$$

Note that the total value of white items that are assigned to the agents during the algorithm is equal to  $V_i(\mathcal{W}(\mathcal{M} \setminus \mathcal{F}))$ . The rest of the white items are still in  $\mathcal{F}$ . Thus, we have

$$V_i(\mathcal{W}(\mathcal{M})) = V_i(\mathcal{W}(\mathcal{M} \setminus \mathcal{F})) + V_i(\mathcal{F}) \quad (18)$$

Now, we provide an upper bound on the value of  $V_i(\mathcal{W}(\mathcal{M} \setminus \mathcal{F}))$ . As a warm up, one can trivially prove an upper bound of  $2\epsilon_i(2n - 1 - |B_1| - 2|B_2|)$  on  $V_i(\mathcal{W}(\mathcal{M} \setminus \mathcal{F}))$ . This follows from the fact that two sets of items are assigned to any agent and hence we have a total of  $2n$  disjoint sets. Among these  $2n$  sets, at least one of them is empty (since  $g_i = \emptyset$ ) and at least  $|B_1| + 2|B_2|$  of the sets contain a single blue item. On the other hand, by Lemmas 5, 8, 9 and 11 every set with white items is of worth at most  $2\epsilon_i$  to  $a_i$ . Therefore, the total value of the white items in  $\mathcal{M} \setminus \mathcal{F}$  to  $a_i$  is less than  $2\epsilon_i(2n - 1 - |B_1| - 2|B_2|)$  and thus

$$V_i(\mathcal{W}(\mathcal{M} \setminus \mathcal{F})) \leq 2\epsilon_i(2n - 1 - |B_1| - 2|B_2|).$$

However, in order to complete the proof, we need a stronger upper bound on  $V_i(\mathcal{W}(\mathcal{M} \setminus \mathcal{F}))$ . To this end, we provide the following auxiliary lemma.

**LEMMA 20.** *Let  $a_j$  be an agent such that  $|f_j| = 1$  and  $V_i(f_j) > V_i(f_i)$ . Then,  $V_i(g_j) < \epsilon_i$ .*

**Proof.** First, note that if  $a_j$  is not satisfied yet, then  $g_j = \emptyset$  and therefore  $V_i(g_j) < \epsilon_i$ . Otherwise, we argue that agent  $a_j$  is either satisfied in the second phase, or in the refinement phases of  $\mathcal{C}_1$  or  $\mathcal{C}_2$ .

Consider the case that  $a_j$  is satisfied in the second phase. If  $a_j \in \mathcal{S}_2^s \cup \mathcal{S}_3$ , then by Lemma 11,  $V_i(g_j) < \epsilon$  holds. Also, if  $a_j \in \mathcal{S}_1^s$ , considering the fact that  $a_i$  envies  $a_j$ ,  $a_i \prec_{pr} a_j$ . Thus, by Lemma 11, we have  $V_i(g_j) < \epsilon_i$ .

Next, consider the case that  $a_j$  is in  $\mathcal{S}_1^r \cup \mathcal{S}_2^r$ . Note that the matching of the refinement phase of  $\mathcal{C}_1$  preserves the property described in Lemma 6. Hence, if  $a_j$  belongs to  $\mathcal{S}_1^r$ , then either  $a_j \prec_{pr} a_i$  or there is no edge between  $y_i$  and  $M_1(y_j)$  in  $G_1$ , where  $M_1(y_j)$  is the vertex matched with  $y_j$  in  $M_1$ . If  $a_j \prec_{pr} a_i$ , according to Observation 2,  $V_i(f_j) \leq 3/4 - \epsilon_i$  holds. On the other hand, by the definition, if no edge exists between  $y_i$  and  $M_1(y_j)$  in  $G_1$ ,  $V_i(g_j) < \epsilon_i$ . In addition to this, if  $a_j$  belongs to  $\mathcal{S}_2^r$ , according to Lemma 8,  $V_i(g_j) < \epsilon_i$  holds. Therefore, Lemma 20 holds for the agents in  $\mathcal{S}_1^r \cup \mathcal{S}_2^r$ .  $\square$

Note that since matching  $M$  of  $G_{1/2}$  for building Cluster  $\mathcal{C}_1$  is **MCMWM**, according to the third condition of Lemma 5, there exists no agent  $a_k$ , such that  $|g_k| = 1$  and  $V_i(g_k) > 3/4 - \epsilon_i$ . Otherwise, by assigning the item in  $g_j$  to  $a_i$  instead of the item in  $f_i$ , we can increase the total weight of the matching, that contradicts the maximality of  $M$ .

According to Lemma 20, for all the agents  $a_j$  with the property that  $f_j$  is a blue item that belongs to a partition in  $\hat{B}_1$ ,  $V_i(g_j) < \epsilon_i$  holds. The number of such agents is at least  $|\hat{B}_1|$ . Therefore, the total value of  $V_i(\mathcal{W}(\mathcal{M} \setminus \mathcal{F}))$  is less than  $2\epsilon_i \cdot (2n - 1 - |B_1| - 2|B_2| - |\hat{B}_1|) + \epsilon_i \cdot |\hat{B}_1|$ . Combining the bounds obtained in Observation 17 and Lemma 20 by Inequality (18), we have:

$$V_i(\mathcal{F}) \geq 2\epsilon_i \cdot (2n - 2|B_2| - |B_1| - |\hat{B}_1|) + \epsilon_i \cdot (|\hat{B}_1|) - 2\epsilon_i \cdot (2n - 1 - |B_1| - 2|B_2| - |\hat{B}_1|) - \epsilon_i \cdot |\hat{B}_1|$$

That is:

$$V_i(\mathcal{F}) \geq 2\epsilon_i$$

This contradicts the fact that the set  $\mathcal{F}$  is not feasible for  $a_i$ .  $\square$

**Proof of Lemma 15:** Lemmas 13 and 14 state that at the end of the algorithm,  $\mathcal{C}_1 = \mathcal{C}_3 = \emptyset$ . Now, let  $a_i$  an agent in  $\mathcal{C}_2$  which does not envy any other agent of  $\mathcal{C}_2$ . We consider two cases separately:  $\epsilon_i \geq 1/8$  and  $\epsilon_i < 1/8$ .

If  $\epsilon_i \geq 1/8$ , the proof follows from a similar argument we used to prove Lemma 14.

LEMMA 21. *If  $\epsilon_i \geq 1/8$ , then the following inequality holds:*

$$\sum_{a_j \in \mathcal{S}} V_i(f_j \cup g_j) \leq |\mathcal{S}| + 1/8.$$

**Proof.** We know  $\mathcal{S} = \mathcal{S}_1 \cup \mathcal{S}_2 \cup \mathcal{S}_3$ . For every agent  $a_j$  in  $\mathcal{S}_3$ , by Lemmas 11 and 9, we know  $V_i(f_j) < 3/4$ . Also, according to Lemma 11,  $V_i(g_j) < \epsilon_i \leq 1/4$ . Therefore,

$$\sum_{a_j \in \mathcal{S}_3} V_i(f_j \cup g_j) \leq \sum_{a_j \in \mathcal{S}_3} (3/4 + 1/4) = |\mathcal{S}_3|. \quad (19)$$

Now, consider an agent  $a_j \in \mathcal{S}_1$ . Note that by Lemma 3,  $V_i(f_j) < 1/2$ . Also, remark that either  $a_j \in \mathcal{S}_1^r$  or  $a_j \in \mathcal{S}_1^s$ . If  $a_j \in \mathcal{S}_1^r$  then according to Lemma 4,  $V_i(g_j) < 1/2$  holds and hence  $V_i(f_j \cup g_j) < 1$ . Also, If  $a_j \in \mathcal{S}_1^s$ , then according to Lemma 11,  $V_i(g_j) < 2\epsilon_i < 1/2$ . Thus, in both cases,  $V_i(f_j \cup g_j) < 1$  and hence:

$$\sum_{a_j \in \mathcal{S}_1} V_i(f_j \cup g_j) \leq \sum_{a_j \in \mathcal{S}_1} 1 = |\mathcal{S}_1|. \quad (20)$$

Finally consider a satisfied agent  $a_j \in \mathcal{S}_2$ . Again, remark that either  $a_j \in \mathcal{S}_2^r$  or  $a_j \in \mathcal{S}_2^s$  holds.

Consider the case that  $a_j \in \mathcal{S}_2^s$ . If  $a_j \prec_{pr} a_i$ , then by Observation 2,  $V_i(f_j) \leq 3/4 - \epsilon_i$  and by Lemma 11,  $V_i(g_j) < 2\epsilon_i \leq 1/4 + \epsilon_i$  which means  $V_i(f_j \cup g_j) < 1$ . Moreover, if  $a_i \prec_{pr} a_j$ , according to Lemmas 11 and 11,  $V_i(f_j \cup g_j) < 3/4 + \epsilon_i \leq 1$ . Thus, we have:

$$\sum_{a_j \in \mathcal{S}_2^s} V_i(f_j \cup g_j) \leq \sum_{a_j \in \mathcal{S}_2^s} 1 = |\mathcal{S}_2^s|. \quad (21)$$

It only remains to investigate the case where  $a_j \in \mathcal{S}_2^r$ . Note that since  $a_i$  is not satisfied in the refinement phase of  $\mathcal{C}_2$ , if  $a_i \prec_{pr} a_j$ , then  $V_i(g_j) < \epsilon_i \leq 1/4$ . Otherwise, we could assign the item in  $g_j$  to  $a_i$  in the refinement of  $\mathcal{C}_2$ . Also, by Lemma 11,  $V_i(f_j) < 3/4$  holds which yields  $V_i(f_j \cup g_j) < 1$ .

Finally, if  $a_j \prec_{pr} a_i$ , by Observation 2  $V_i(f_j) \leq 3/4 - \epsilon_i$  holds. Corollary 1 states that there is at most one item  $b_k$  with  $\mathcal{M}_k \in \mathcal{X}' \setminus \mathcal{X}'_{1/2}$  and  $V_i(b_k) \geq 3/8$ . Also, note that since  $b_k$  belongs to  $\mathcal{X}' \setminus \mathcal{X}'_{1/2}$ ,  $V_i(\{b_k\}) < 1/2$  holds. For agent  $a_j$ , let  $b_l$  be the item that is assigned to  $a_j$  in the refinement of  $\mathcal{C}_2$ , i.e.,  $g_j = \{b_l\}$ . We have

$$V_i(f_j \cup g_j) \leq 3/4 - \epsilon_i + V_i(\{b_l\}).$$

If  $b_l \neq b_k$ ,  $V_i(f_j \cup g_j) \leq 3/4 - \epsilon_i + 3/8$  holds which by the fact that  $\epsilon_i \geq 1/8$ , implies  $V_i(f_j \cup g_j) \leq 3/4 - 1/8 + 3/8 \leq 1$ . In addition to this, If  $b_l = b_k$ ,  $V_i(f_j \cup g_j) \leq 3/4 - 1/8 + 4/8 \leq 1 + 1/8$ . But this can happen for at most one agent. Thus, for every agent  $a_j$  in  $\mathcal{S}_2^r$ ,  $V_i(f_j \cup g_j) \leq 1$  holds and for at most one agent  $a_j \in \mathcal{S}_2^r$ ,  $V_i(f_j \cup g_j) \leq 1 + 1/8$ . Thus, we have

$$\sum_{a_j \in \mathcal{S}_2^r} V_i(f_j \cup g_j) \leq |\mathcal{S}_2^r| + 1/8. \quad (22)$$

Inequality (22) together with Inequality (21) yields

$$\sum_{a_j \in \mathcal{S}_2} V_i(f_j \cup g_j) \leq |\mathcal{S}_2| + 1/8. \quad (23)$$

Furthermore, by Inequalities (19), (20) and (23) we have

$$\begin{aligned} \sum_{a_j \in \mathcal{S}} V_i(f_j \cup g_j) &= \sum_{a_j \in \mathcal{S}_1} V_i(f_j \cup g_j) + \sum_{a_j \in \mathcal{S}_2} V_i(f_j \cup g_j) + \sum_{a_j \in \mathcal{S}_3} V_i(f_j \cup g_j) \\ &\leq |\mathcal{S}_1| + |\mathcal{S}_2| + 1/8 + |\mathcal{S}_3| \\ &\leq |\mathcal{S}| + 1/8. \end{aligned} \quad (24)$$

□

By Lemma 21, value of agent  $a_i$  for the items allocated to the satisfied agents is less than  $|\mathcal{S}| + 1/8$ . Recall that  $\mathcal{C}_2 = \mathcal{C}_3 = \emptyset$  and hence  $|\mathcal{S}| = n - |\mathcal{C}_2|$ . Therefore,

$$\sum_{a_j \in \mathcal{S}} V_i(f_j \cup g_j) \leq n - |\mathcal{C}_2| + 1/8. \quad (25)$$

Since  $a_i$  does not envy any agent of  $\mathcal{C}_2$ , for all  $a_j \in \mathcal{C}_2$ , we have  $V_i(f_j) \leq V_i(f_i)$ . On the other hand, since the total value of all items for  $a_i$  is equal to  $n$  we have

$$\begin{aligned} V_i(\mathcal{F}) &= V_i(\mathcal{M}) - \sum_{a_j \in \mathcal{C}_2} V_i(f_j) - \sum_{a_j \in \mathcal{S}} V_i(f_j \cup g_j) \\ &= n - \sum_{a_j \in \mathcal{C}_2} V_i(f_j) - \sum_{a_j \in \mathcal{S}} V_i(f_j \cup g_j) \\ &\geq n - \sum_{a_j \in \mathcal{C}_2} V_i(f_j) - [n - |\mathcal{C}_2| + 1/8] \\ &= |\mathcal{C}_2| - 1/8 - \sum_{a_j \in \mathcal{C}_2} V_i(f_j). \end{aligned} \quad (26)$$

Also,  $V_i(f_i) = 3/4 - \epsilon_i$  holds and  $V_i(f_j) \leq V_i(f_i)$  for any  $a_j \in \mathcal{C}_2$  follows from the fact that  $a_i$  does not envy other agents of  $\mathcal{C}_2$ . Therefore by Inequality (26) we have

$$\begin{aligned} V_i(\mathcal{F}) &\geq |\mathcal{C}_2| - 1/8 - \sum_{a_j \in \mathcal{C}_2} V_i(f_j) \\ &\geq |\mathcal{C}_2| - 1/8 - \sum_{a_j \in \mathcal{C}_2} V_i(f_i) \\ &= |\mathcal{C}_2| - 1/8 - |\mathcal{C}_2| V_i(f_i) \\ &= |\mathcal{C}_2| - 1/8 - |\mathcal{C}_2| (3/4 - \epsilon_i) \\ &= |\mathcal{C}_2| (1/4 + \epsilon_i) - 1/8. \end{aligned}$$

Recall that by definition  $\epsilon_i \geq 1/8$  holds. Moreover,  $\epsilon_i \leq 1/4$ , and thus

$$\begin{aligned} V_i(\mathcal{F}) &\geq |\mathcal{C}_2| (1/4 + \epsilon_i) - 1/8 \\ &\geq |\mathcal{C}_2| 2\epsilon_i - 1/8 \\ &\geq |\mathcal{C}_2| 2\epsilon_i - \epsilon_i \end{aligned}$$

and since  $|\mathcal{C}_2| \geq 1$ ,

$$\begin{aligned} V_i(\mathcal{F}) &\geq |\mathcal{C}_2| 2\epsilon_i - \epsilon_i \\ &\geq 2\epsilon_i - \epsilon_i \\ &\geq \epsilon_i \end{aligned}$$

and thus  $\mathcal{F}$  is feasible for  $a_i$ . This contradicts the termination of the algorithm.

Next, we investigate the case that  $\epsilon < 1/8$ . Our proof for this case is similar to the one for  $\mathcal{C}_1$ . Let  $\mathcal{S}_1^r$  be the agents in  $\mathcal{S}_1$  that are satisfied in the refinement phase and let

$$\mathcal{M}_1^r = \bigcup_{a_j \in \mathcal{S}_1^r} f_j \cup g_j.$$

Lemma 7 states that the maximin value of the agents in  $\mathcal{C}_2 \cup \mathcal{C}_3$  for the items in  $\mathcal{M}' = \mathcal{M} \setminus \mathcal{M}_1^r$  is at least 1. More precisely for every  $a_j \in \mathcal{C}_2$ :

$$\text{MMS}_j^{n-|\mathcal{S}_1^r|}(\mathcal{M} \setminus \mathcal{M}_1^r) \geq 1 \quad (27)$$

We color the items of  $\mathcal{M}'$  in one of four colors blue, red, green, or white. Initially, all the items are colored in white. For each agent  $a_j \in \mathcal{N} \setminus \mathcal{S}_1^r$ , if  $|f_j| = 1$ , then we color the item in  $f_j$  in blue. Also, if  $|f_j| = 2$  (which means  $f_j$  is corresponding to a merged vertex), color both the elements of  $f_j$  in red. In addition to this, if  $|g_j| = 1$  then color the item in  $g_j$  in green. For any set  $S \subseteq \mathcal{M}$ , we denote the subset of blue, red, green, and white items in  $S$  by  $\mathcal{B}(S), \mathcal{R}(S), \mathcal{G}(S)$ , and  $\mathcal{W}(S)$ , respectively. Recall that by Lemma 8, every pair of items in red or green are worth less than  $3/4$  in total to  $a_i$ . In other words, for any two different items  $b_j, b_k \in \mathcal{B}(\mathcal{M}) \cup \mathcal{G}(\mathcal{M})$  we have

$$V_i(\{b_j, b_k\}) \leq 3/4.$$

Also, By Lemmas 11 and 9, every set including white items is worth less than  $2\epsilon_i < 1/4$  to  $a_i$ . Let  $n' = n - |\mathcal{S}_1^r|$ . Let  $\mathcal{P} = \langle P_1, P_2, \dots, P_{n'} \rangle$  be the optimal  $n'$ -partitioning of  $\mathcal{M}'$  for  $a_i$ . Recall that by Inequality (27), the value of every partition in  $\mathcal{P}$  is at least 1 for  $a_i$ . Based on the number of blue and red items in every partition, we define three sets of partitions:

- $B_{00}$  : Partitions with no red or blue items.
- $B_{10}$  : Partitions with blue items, but without any red items.
- $B_{01}$  : Partitions that contain at least one red item.

Next we prove Lemmas 22 and 23 to be used later in the proof.

LEMMA 22. *Let  $|\mathcal{G}(B_{00})|$  be the number of green items in the partitions of  $B_{00}$ . Then,*

$$V_i(\mathcal{W}(B_{00})) \geq (3|B_{00}| - |\mathcal{G}(B_{00})|) \cdot 1/4.$$

**Proof.** Let  $B_{00}^j$  be the set of partitions in  $B_{00}$  that contain exactly  $j$  green items. We have:

$$|\mathcal{G}(B_{00})| = \sum_{1 \leq j < \infty} j|B_{00}^j| \geq |B_{00}^1| + 2|B_{00}^2| + \sum_{3 \leq j < \infty} 3|B_{00}^j| \quad (28)$$

Also, we have:

$$3|B_{00}| = \sum_{0 \leq j < \infty} 3|B_{00}^j| = 3|B_{00}^0| + 3|B_{00}^1| + 3|B_{00}^2| + \sum_{3 \leq j < \infty} 3|B_{00}^j| \quad (29)$$

Finally, we argue that the value of white items in  $B_{00}$  is at least  $|B_{00}^0| + |B_{00}^1| \cdot 1/2 + |B_{00}^3| \cdot 1/4$ . This follows from the fact that every green item in  $P_k \in B_{00}^1$  has a value less than  $1/2$  and by Lemma 8, every pair of green items in  $P_k \in B_{00}^2$  are worth less than  $3/4$  to  $a_j$ . According to the fact that the value of every partition  $P_k$  is at least 1, we have:

$$V_i(\mathcal{W}(B_{00})) \geq |B_{00}^0| + |B_{00}^1| \cdot 1/2 + |B_{00}^3| \cdot 1/4 = (4|B_{00}^0| + 2|B_{00}^1| + |B_{00}^2|) \cdot 1/4 \quad (30)$$

According to Equations (28) and (29), we have:

$$3|B_{00}| - |\mathcal{G}(B_{00})| \leq 3|B_{00}^0| + 2|B_{00}^1| + |B_{00}^2| \leq 4|B_{00}^0| + 2|B_{00}^1| + |B_{00}^2| \quad (31)$$

Next we combine Equations (30) and (31) to obtain:

$$V_i(\mathcal{W}(B_{00})) \geq (3|B_{00}| - |\mathcal{G}(B_{00})|) \cdot 1/4. \quad (32)$$

□

LEMMA 23.  $V_i(\mathcal{W}(B_{10})) \geq (2|B_{10}| - |\mathcal{B}(B_{10})| - |\mathcal{G}(B_{10})|) \cdot 1/4$

**Proof.** First, note that every partition in  $B_{10}$  contains at least one blue item. Let  $B_{10}^w$  be the partitions in  $B_{10}$  that contains exactly one blue item and no green item. The other items in each partition of  $B_{10}^w$ , are white. Since the problem is  $3/4$ -irreducible, the value of every blue item to  $a_i$  is less than  $3/4$  and therefore we have:

$$V_i(\mathcal{W}(B_{10})) \geq |B_{10}^w| \cdot 1/4$$

or

$$4V_i(\mathcal{W}(B_{10})) \geq |B_{10}^w|. \quad (33)$$

Moreover, let  $B_{10}^{\bar{w}} = B_{10} \setminus B_{10}^w$ . Since every partition in  $B_{10}$  contains at least one blue item, every partition in  $B_{10}^{\bar{w}}$  contains at least two items with colors blue or green. Thus, we have:

$$|\mathcal{G}(B_{10}^{\bar{w}})| + |\mathcal{B}(B_{10}^{\bar{w}})| \geq 2|B_{10}^{\bar{w}}| \quad (34)$$

Summing up Equations (33) and (34) results in

$$4V_i(\mathcal{W}(B_{10})) + |\mathcal{G}(B_{10}^{\bar{w}})| + |\mathcal{B}(B_{10}^{\bar{w}})| \geq 2|B_{10}^{\bar{w}}| + |B_{10}^w|$$

which implies:

$$4V_i(\mathcal{W}(B_{10})) \geq 2|B_{10}^{\bar{w}}| - |\mathcal{G}(B_{10}^{\bar{w}})| - |\mathcal{B}(B_{10}^{\bar{w}})| + |B_{10}^w|. \quad (35)$$

Moreover, we have  $|\mathcal{B}(B_{10})| = |\mathcal{B}(B_{10}^w)| + |\mathcal{B}(B_{10}^{\bar{w}})|$ . According to the fact that every partition in  $B_{10}^w$  contains exactly one blue item,  $|\mathcal{B}(B_{10}^w)| = |B_{10}^w|$  and hence,  $|\mathcal{B}(B_{10})| = |B_{10}^w| + |\mathcal{B}(B_{10}^{\bar{w}})|$ . By Equation (35), we have:

$$4V_i(\mathcal{W}(B_{10})) \geq 2|B_{10}^{\bar{w}}| - |\mathcal{G}(B_{10}^{\bar{w}})| - |\mathcal{B}(B_{10})| + |B_{10}^w| + |B_{10}^w|.$$

Finally by the fact that  $2|B_{10}^w| + 2|B_{10}^{\bar{w}}| = 2|B_{10}|$ , we have:

$$4V_i(\mathcal{W}(B_{10})) \geq 2|B_{10}| - |\mathcal{G}(B_{10}^{\bar{w}})| - |\mathcal{B}(B_{10})|$$

which is:

$$V_i(\mathcal{W}(B_{10})) \geq (2|B_{10}| - |\mathcal{B}(B_{10})| - |\mathcal{G}(B_{10}^{\bar{w}})|) \cdot 1/4$$

□

For the partitions in  $B_{01}$ , we construct a graph  $G_{01}(V_{01}, E_{01})$ , where every vertex  $v_j \in V_{01}$  corresponds to a partition  $P_j \in B_{01}$ . Consider an agent  $a_j$  such that  $f_j$  consists of a pair of red items  $b_k, b_{k'}$  and let  $b_k \in P_l$  and  $b_{k'} \in P_{l'}$ . We add an edge  $(v_l, v_{l'})$  to  $E_{01}$ . By the definition of  $B_{01}$ ,  $P_l, P_{l'} \in B_{01}$  holds. Note that  $b_k$  and  $b_{k'}$  might belong to the same partition, i.e.,  $P_l = P_{l'}$ . In this case, we add a loop to  $G_{01}$ . Furthermore, for every item  $b_k \in \mathcal{B}(B_{01})$ , we add a loop to the vertex  $v_l$ , where  $b_k \in P_l$ .

Next, define  $R_j$  as the set of partitions in  $B_{01}$ , such that the degree of their corresponding vertices in  $V_{01}$  are equal to  $j$ . In other words:

$$P_k \in R_j \iff d(v_k) = j$$

We now prove Lemma 24.

LEMMA 24. *For  $R_1$ , we have:*

$$V_i(\mathcal{W}(R_1)) \geq (2|R_1| - |\mathcal{G}(R_1)|) \cdot 1/4.$$

**Proof.** Consider a partition  $P_j \in R_1$ . Since  $d(v_j) = 1$ ,  $P_j$  contains exactly one red item and no blue item. Thus, other items in  $P_j$  are either green or white. We show that

$$|\mathcal{G}(P_j)| + 4.V_i(\mathcal{W}(P_j)) \geq 2. \quad (36)$$

First, note that if  $|\mathcal{G}(P_j)| \geq 2$ , then Inequality (36) holds. Also, if  $|\mathcal{G}(P_j)| = 0$ , then  $V_i(\mathcal{W}(P_j)) \geq 1/2$ , because the value of the red item in  $P_j$  is less than  $1/2$  (recall that all the red items correspond to the vertices in  $\mathcal{X}' \setminus \mathcal{X}'_{1/2}$ ). This immediately implies the fact that  $4.V_i(\mathcal{W}(P_j)) \geq 2$ . Finally, if  $|\mathcal{G}(P_j)| = 1$ , then by Lemma 8, the total value of the green and red items in  $P_j$  is less than  $3/4$  and hence,  $V_i(\mathcal{W}(P_j)) \geq 1/4$  which means  $|\mathcal{G}(P_j)| + 4.V_i(\mathcal{W}(P_j)) \geq 2$ .

Since Inequality (36) holds for every partition  $P_j \in R_1$ , we have:

$$\sum_{P_j \in R_1} (|\mathcal{G}(P_j)| + 4.V_i(\mathcal{W}(P_j))) \geq 2|R_1|.$$

Therefore,

$$|\mathcal{G}(R_1)| + 4.V_i(\mathcal{W}(R_1)) \geq 2|R_1|$$

and hence,

$$V_i(\mathcal{W}(R_1)) \geq (2|R_1| - |\mathcal{G}(R_1)|) \cdot 1/4.$$

□

LEMMA 25. For  $R_2$ , we have  $V_i(\mathcal{W}(R_2)) \geq (|R_2| - |\mathcal{G}(R_2)|) \cdot 1/4$ .

**Proof.** Let  $P_j$  be a partition in  $R_2$ . First, we show the following inequality holds:

$$4V_i(\mathcal{W}(P_j)) + |\mathcal{G}(P_j)| \geq 1. \quad (37)$$

By the definition of  $R_2$ , degree of  $v_j$  is 2. Therefore,  $P_j$  contains two red items. Note that the degree of the partitions in  $B_{01}$  that contain blue items is at least 3. Thus,  $P_j$  contains no blue items. By Lemma 8, the total value of the red items in  $P_j$  is less than  $3/4$ . The rest of the items in  $P_j$  are either green or white. If  $P_j$  contains a green item, then Inequality (37) holds. On the other hand, if  $P_j$  contains no green items, then  $V_i(\mathcal{W}(P_j)) \geq 1/4$  and hence,  $4V_i(\mathcal{W}(P_j)) \geq 1$ . Therefore, Inequality (37) holds in both cases. Summing up Inequality (37) for all the partitions in  $R_2$ , we have:

$$\sum_{P_j \in R_2} (4V_i(\mathcal{W}(P_j)) + |\mathcal{G}(P_j)|) \geq |R_2|$$

which means:

$$4V_i(\mathcal{W}(R_2)) + |\mathcal{G}(R_2)| \geq |R_2|$$

That is:

$$V_i(\mathcal{W}(R_2)) \geq (|R_2| - |\mathcal{G}(R_2)|) \cdot 1/4$$

□

Putting together Lemmas 22,23,24, and 25 we obtain the following lower bound on the valuation of  $a_i$  for all white items:

$$\begin{aligned}
 V_i(\mathcal{W}(\mathcal{M}')) &= V_i(\mathcal{W}(B_{00})) + V_i(\mathcal{W}(B_{01})) + V_i(\mathcal{W}(B_{10})) \\
 &\geq \left(3|B_{00}| - |\mathcal{G}(B_{00})|\right) \cdot 1/4 + \left(2|B_{10}| - |\mathcal{B}(B_{10})| - |\mathcal{G}(B_{10})|\right) \cdot 1/4 \\
 &\quad + \left(2|R_1| - |\mathcal{G}(R_1)|\right) \cdot 1/4 + \left(|R_2| - |\mathcal{G}(R_2)|\right) \cdot 1/4 \\
 &= \left(3|B_{00}| + 2|B_{10}| + 2|R_1| + |R_2| - |\mathcal{B}(B_{10})| - (|\mathcal{G}(B_{00})| + |\mathcal{G}(B_{10})| + |\mathcal{G}(R_1)| + |\mathcal{G}(R_2)|)\right) \cdot 1/4 \\
 &\geq \left(3|B_{00}| + 2|B_{10}| + 2|R_1| + |R_2| - |\mathcal{B}(B_{10})| - |\mathcal{G}(\mathcal{M}')|\right) \cdot 1/4
 \end{aligned} \tag{38}$$

where  $|\mathcal{G}(\mathcal{M}')|$  is the total number of green items.

The items in  $\mathcal{W}(\mathcal{M}')$  are either allocated to an agent during the second phase, or are still in  $\mathcal{F}$ . Let  $\mathcal{W}_2$  be the white items that are allocated to an agent during the second phase. We have:

$$V_i(\mathcal{W}(\mathcal{M}')) = V_i(\mathcal{W}_2) + V_i(\mathcal{F}). \tag{39}$$

Now, we present an upper bound on the value of  $V_i(\mathcal{W}_2)$ . First, note that the number of agents in  $\mathcal{S} \setminus \mathcal{S}_1^r$  is  $n'$ . Each of these  $n'$  agents has two sets  $f_j$  and  $g_j$ , that leaves us  $2n'$  sets. Since  $g_i = \emptyset$  we know that at least one of these sets is empty. Moreover, all of these  $|\mathcal{G}(\mathcal{M}')|$  sets contain a single green item and  $|\mathcal{B}(B_{10})| + |E_{01}|$  of the sets contain either a single blue item, or a pair of red items (recall that each edge of  $G_{01}$  refers to a blue item or a pair of red items). Therefore, the number of the sets that contain only white items is at most:

$$2n' - 1 - |\mathcal{G}(\mathcal{M}')| - |\mathcal{B}(B_{10})| - |E_{01}|.$$

By Lemmas 11 and 9, the value of every set with white items to  $a_i$  is less than  $2\epsilon_i < 1/4$  and hence:

$$V_i(\mathcal{W}_2) \leq (2n' - 1 - |\mathcal{G}(\mathcal{M}')| - |\mathcal{B}(B_{10})| - |E_{01}|) \cdot 1/4. \tag{40}$$

Subtracting the lower bound obtained for  $V_i(\mathcal{W}(\mathcal{M}'))$  in (38) from the upper bound for  $V_i(\mathcal{W}_2)$  in (40) gives us a lower bound on the value of  $\mathcal{F}$ :

$$\begin{aligned}
 V_i(\mathcal{F}) &= V_i(\mathcal{W}(\mathcal{M}')) - V_i(\mathcal{W}_2) \\
 &\geq \left(3|B_{00}| + 2|B_{10}| - |\mathcal{B}(B_{10})| + 2|R_1| + |R_2| - |\mathcal{G}(\mathcal{M}')|\right) \cdot 1/4 - V_i(\mathcal{W}_2) \\
 &\geq \left(3|B_{00}| + 2|B_{10}| - |\mathcal{B}(B_{10})| + 2|R_1| + |R_2| - |\mathcal{G}(\mathcal{M}')|\right) \cdot 1/4 \\
 &\quad - \left(2n' - 1 - |\mathcal{G}(\mathcal{M}')| - |\mathcal{B}(B_{10})| - |E_{01}|\right) \cdot 1/4 \\
 &= \left(3|B_{00}| + 2|B_{10}| + 2|R_1| + |R_2| - 2n' + 1 + |E_{01}|\right) \cdot 1/4 \\
 &= \left(2|B_{00}| + 2|B_{10}| + |B_{00}| + |E_{01}| + 2|R_1| + |R_2| - 2n' + 1\right) \cdot 1/4
 \end{aligned} \tag{41}$$

Next we provide Lemmas 26, 27, and 28 to complete the proof.

LEMMA 26.  $|B_{00}| \geq |E_{01}| - |B_{01}|$

**Proof.** First, note that  $|B_{00}| + |B_{10}| + |B_{01}| = n'$ . Moreover we have  $|\mathcal{B}(B_{10})| + |E_{01}| \leq n'$ . To show this Lemma, note that each edge in  $G_{01}$  corresponds to the first set of an agent in  $\mathcal{S} \setminus \mathcal{S}_1^+$ . Also, every blue item in  $B_{10}$  corresponds to the first set of an agent in  $\mathcal{S} \setminus \mathcal{S}_1^+$ . Therefore, the total number of the agents must be more than this number. By the definition of  $B_{10}$ , we know that  $|\mathcal{B}(B_{10})| \geq |B_{10}|$ . Therefore, we have:

$$\begin{aligned} |B_{00}| + |B_{10}| + |B_{01}| &\geq |\mathcal{B}(B_{10})| + |E_{01}| \\ &\geq |B_{10}| + |E_{01}| \end{aligned} \quad (42)$$

This means:

$$|B_{00}| \geq |E_{01}| - |B_{01}| \quad \square$$

LEMMA 27.  $|E_{01}| \geq 3/2 \sum_{j \geq 3} |R_j| + |R_2| + |R_1|/2$ .

**Proof.**  $|E_{01}| = \frac{\sum_{v_j \in V_{01}} d(v_j)}{2} = \frac{\sum_j j |R_j|}{2} \geq 3/2 \sum_{j \geq 3} |R_j| + |R_2| + |R_1|/2$ . □

LEMMA 28.  $|B_{00}| \geq \frac{\sum_{j \geq 3} |R_j| - |R_1|}{2}$

**Proof.** Lemma 26,  $|B_{00}| \geq |E_{01}| - |B_{01}|$ . Furthermore, by Lemma 27,

$$|E_{01}| \geq 3/2 \sum_{j \geq 3} |R_j| + |R_2| + |R_1|/2.$$

Combining these two inequalities, we have:

$$|B_{00}| \geq 3/2 \sum_{j \geq 3} |R_j| + |R_2| + |R_1|/2 - |B_{01}|. \quad (43)$$

Also, since there is a one-to-one correspondence between  $B_{01}$  and  $V_{01}$ ,  $|B_{01}| = |V_{01}|$  holds. By the definition of  $R_j$ , we have:

$$|V_{01}| = \sum_j |R_j|. \quad (44)$$

By replacing the value obtained for  $B_{01}$  from (44) into Inequality (43), we have:

$$\begin{aligned} |B_{00}| &\geq 1/2 \sum_{j \geq 3} |R_j| - |R_1|/2 \\ &= \frac{\sum_{j \geq 3} |R_j| - |R_1|}{2}. \end{aligned} \quad (45)$$

□

By applying Lemmas 28 and 27 to Inequality (41) we have:

$$\begin{aligned} V_i(\mathcal{F}) &= \left( 2|B_{00}| + 2|B_{10}| + |B_{00}| + |E_{01}| + 2|R_1| + |R_2| - 2n' + 1 \right) \cdot 1/4 \\ &\geq \left( 2|B_{00}| + 2|B_{10}| + \frac{\sum_{j \geq 3} |R_j| - |R_1|}{2} + 3/2 \sum_{j \geq 3} |R_j| + |R_2| + |R_1|/2 + 2|R_1| + |R_2| - 2n' + 1 \right) \cdot 1/4 \\ &= \left( 2|B_{00}| + 2|B_{10}| + \sum_{j \geq 3} 2|R_j| + 2|R_2| + 2|R_1| - 2n' + 1 \right) \cdot 1/4 \end{aligned}$$

Finally, note that  $\sum_{j \geq 3} 2|R_j| + 2|R_2| + 2|R_1| = 2|V_{01}| = 2|B_{01}|$ . This, together with the fact that  $|B_{00}| + |B_{01}| + |B_{10}| = n'$ , yields  $V_i(\mathcal{F}) \geq (2n' - 2n' + 1) \cdot 1/4$ . This means  $V_i(\mathcal{F}) \geq 1/4$  which is a contradiction since  $\mathcal{F}$  is feasible for  $a_i$ . □
